# Supplementary material for: Synthesis and Enzymatic Degradation of Sustainable Levoglucosenone-Derived Copolyesters with Renewable Citronellol Side Chains
Source: MDPI journal article supplement (doi:10.3390/polym14102082), 2022-05-20
Supplement: s1 [file s1]

# Supporting Information

## Synthesis and Enzymatic Degradation of Sustainable Levoglucosenone-derived Copolyesters with Renewable Citronellol Side Chains

Sami Fadlallah \*, Quentin Carboué \*, Louis M. M. Mouterde, Aihemaiti Kayishaer, Yasmine Werghi, Aurélien A. M. Peru, Michel Lopez and Florent Allais \*

URD Agro-Biotechnologies Industrielles (ABI), Centre Européen de Biotechnologie et de Bioéconomie (CEBB), AgroParisTech, 51110 Pomacle, France;  
louis.mouterde@agroparistech.fr (L.M.M.M.); aihemaiti.kayishaer@gmail.com (A.K.);  
yasmine.werghi1@gmail.com (Y.W.); aurelien.peru@agroparistech.fr (A.A.M.P.);  
michel.lopez@agroparistech.fr (M.L.)

\* Correspondence: sami.fadlallah@agroparistech.fr (S.F.); quentin.carboue@agroparistech.fr (Q.C.);  
florent.allais@agroparistech.fr (F.A.)

### Table of contents

|            |    |
|------------|----|
| NMR .....  | 2  |
| FTIR ..... | 13 |
| DSC .....  | 15 |
| TGA .....  | 20 |
| SEC .....  | 23 |

# NMR

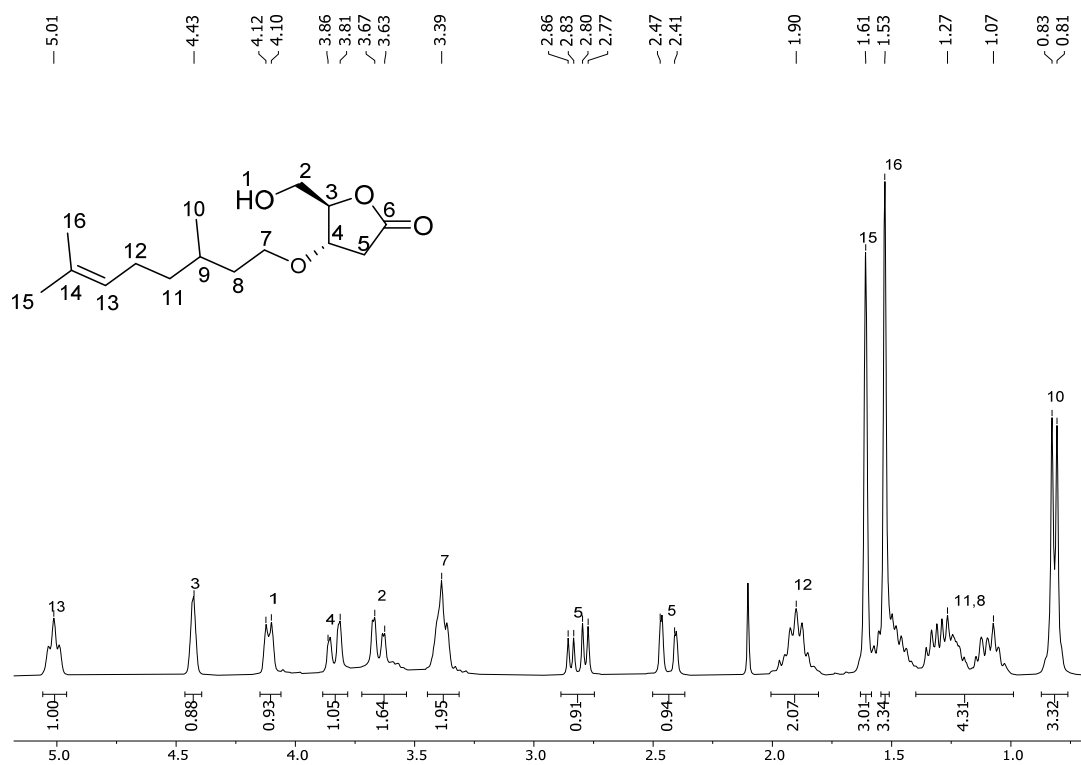

**Figure S1.** <sup>1</sup>H NMR (CDCl<sub>3</sub>) spectrum of HBO-citro.

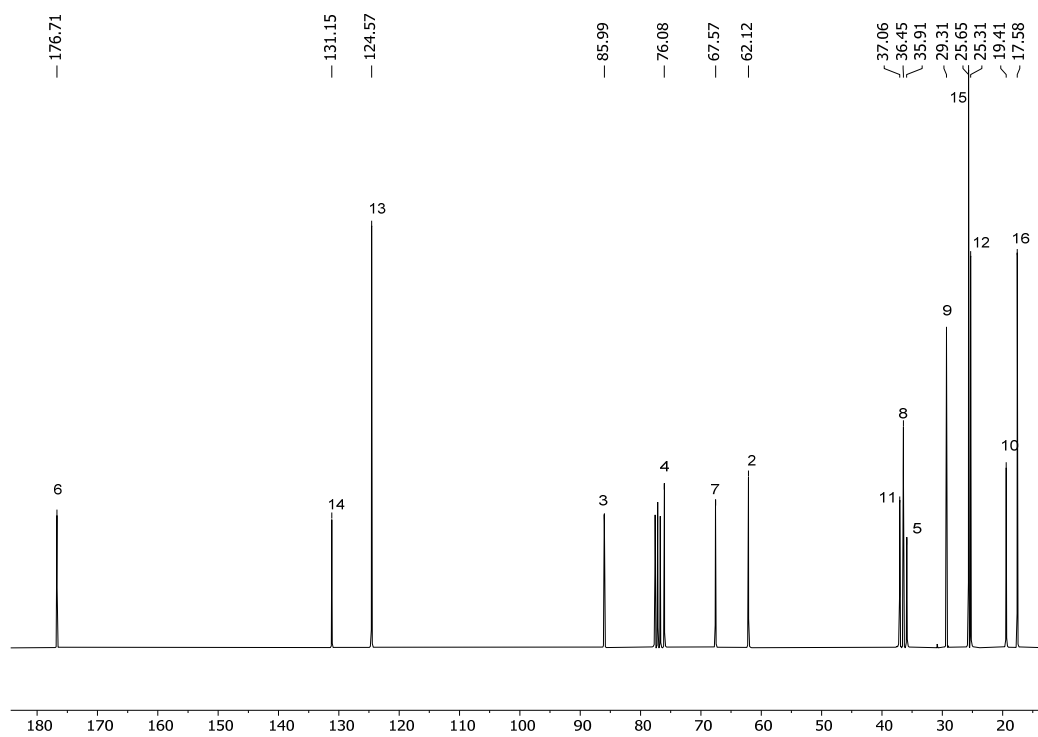

**Figure S2.** <sup>13</sup>C NMR (CDCl<sub>3</sub>) spectrum of HBO-citro.

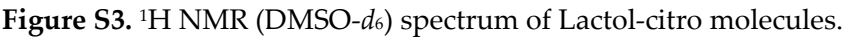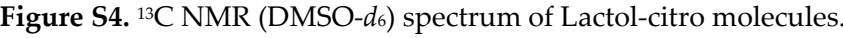

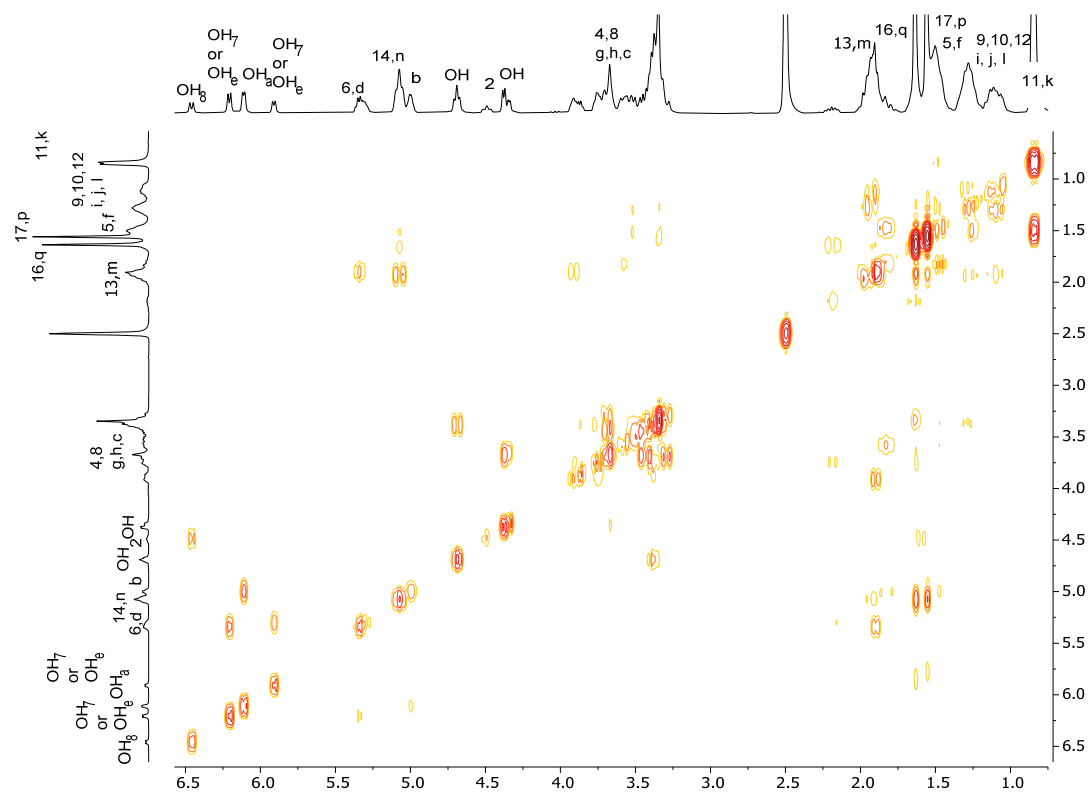

**Figure S5.**  $^1\text{H}$ - $^1\text{H}$  COSY (DMSO- $d_6$ ) spectrum of Lactol-citro molecules.

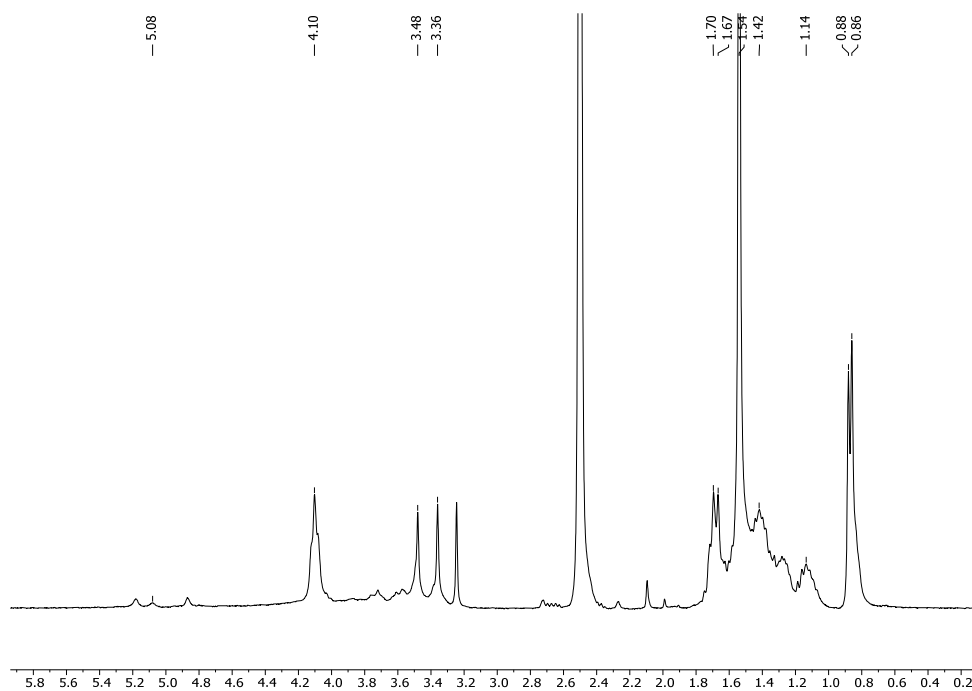

**Figure S6.** Typical  $^1\text{H}$  NMR ( $\text{DMSO-}d_6$ ) spectrum of P5.

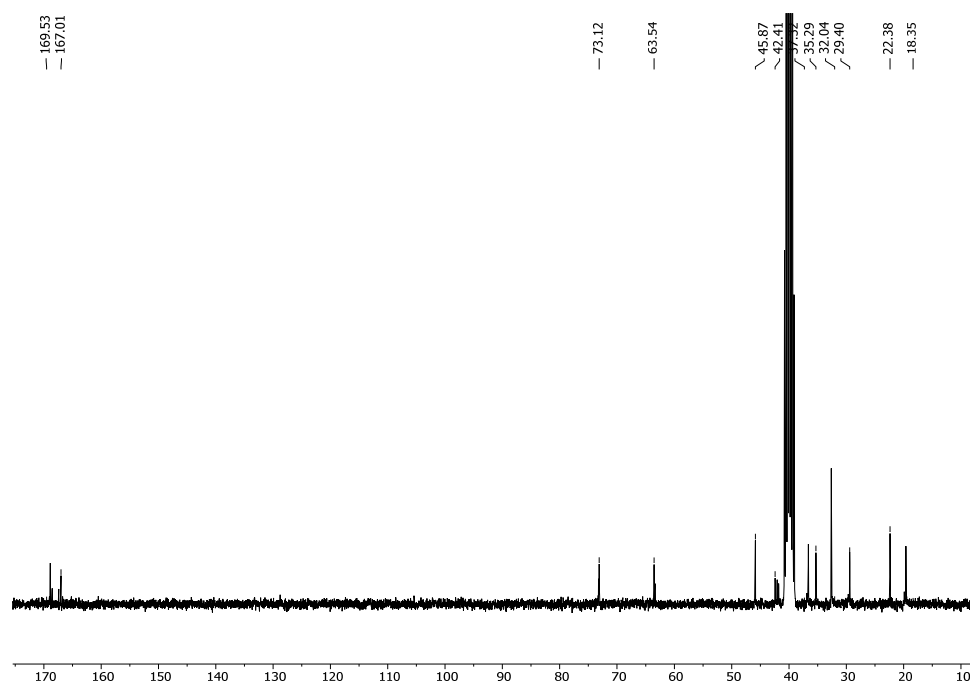

**Figure S7.** Typical  $^{13}\text{C}$  NMR ( $\text{DMSO-}d_6$ ) spectrum of P5.

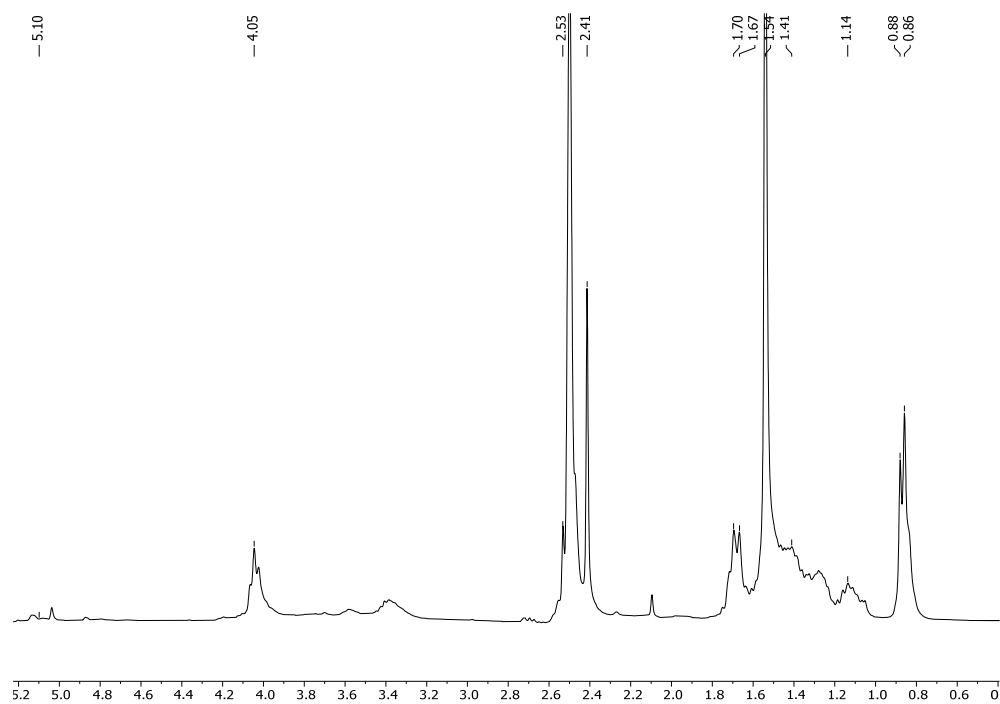

**Figure S8.** Typical  $^1\text{H}$  NMR ( $\text{DMSO}-d_6$ ) spectrum of P6.

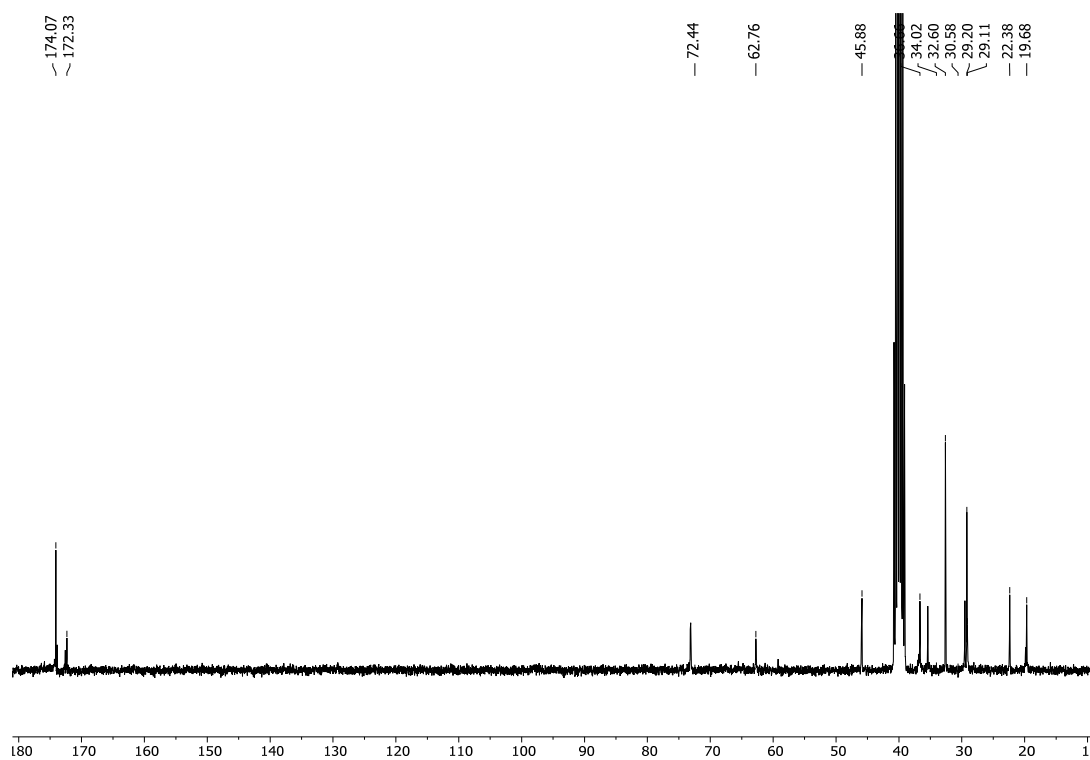

**Figure S9.** Typical  $^{13}\text{C}$  NMR ( $\text{DMSO}-d_6$ ) spectrum of P6.

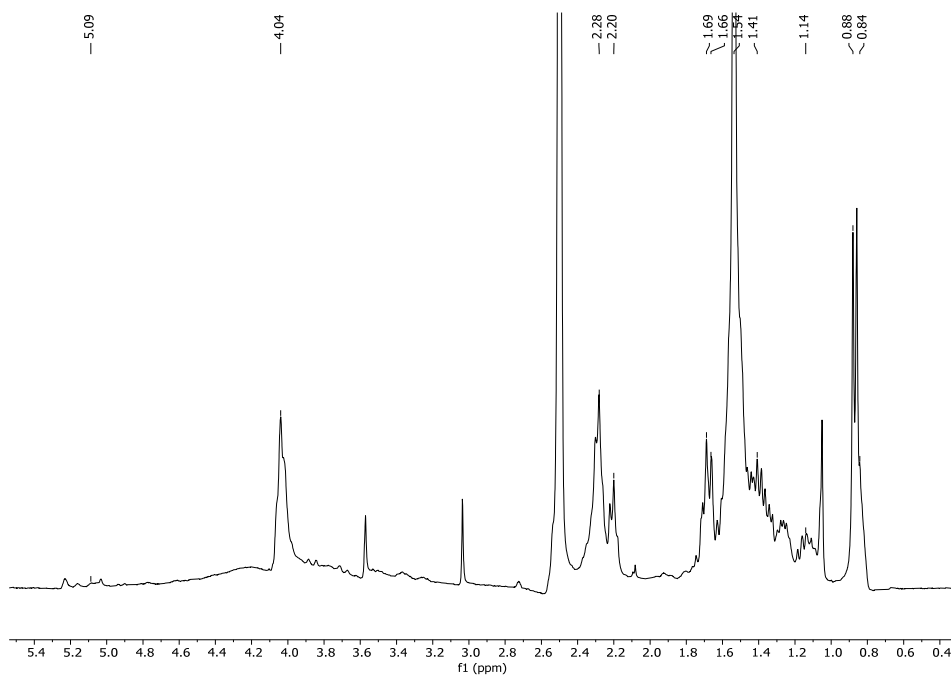

**Figure S10.** Typical  $^1\text{H}$  NMR ( $\text{DMSO-}d_6$ ) spectrum of P7.

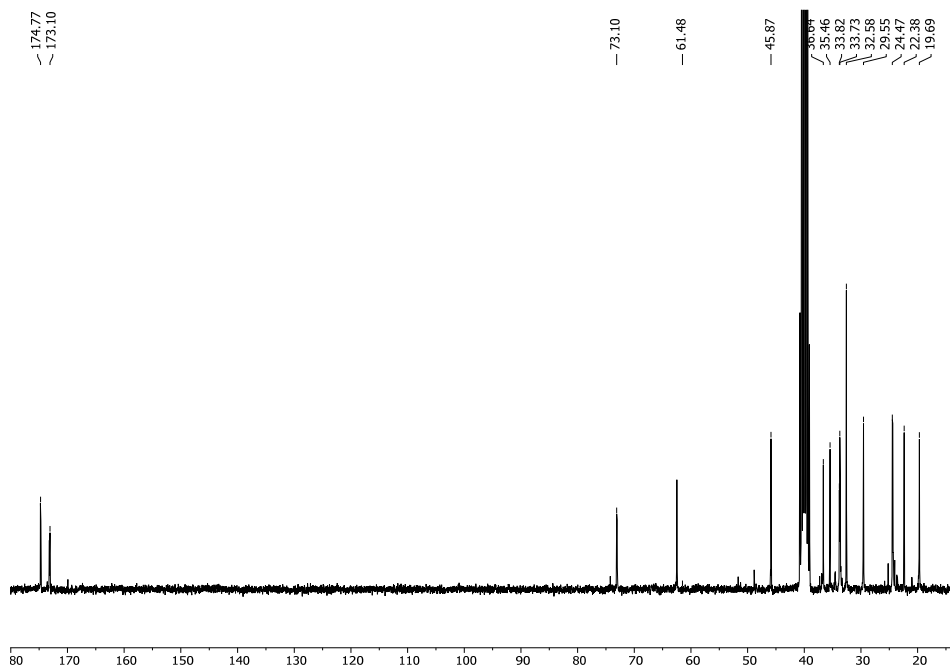

**Figure S11.** Typical  $^{13}\text{C}$  NMR ( $\text{DMSO-}d_6$ ) spectrum of P7.



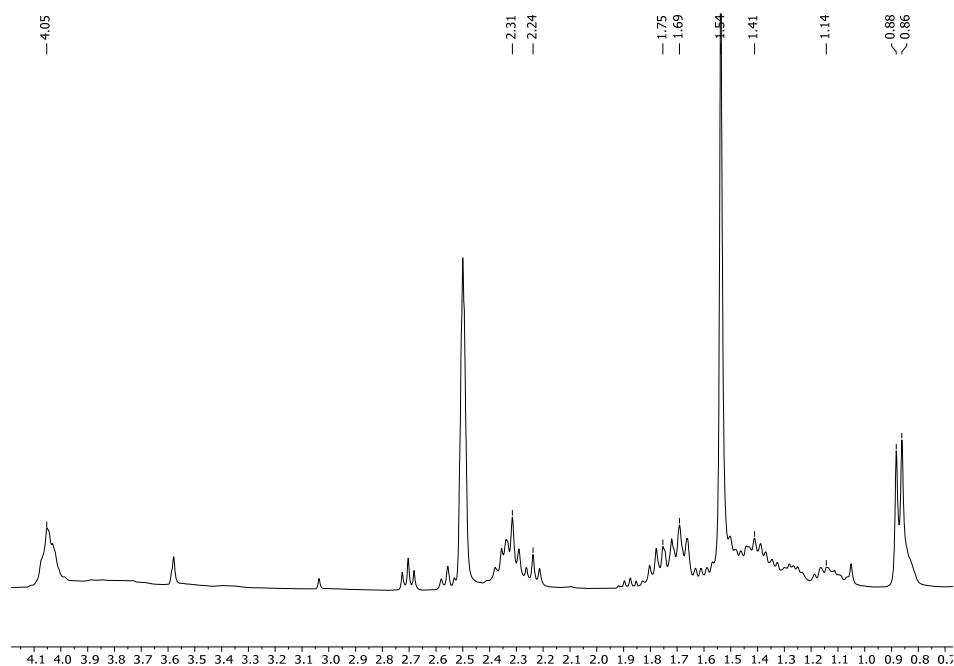

**Figure S12.** Typical  $^1\text{H}$  NMR ( $\text{DMSO-}d_6$ ) spectrum of P8.

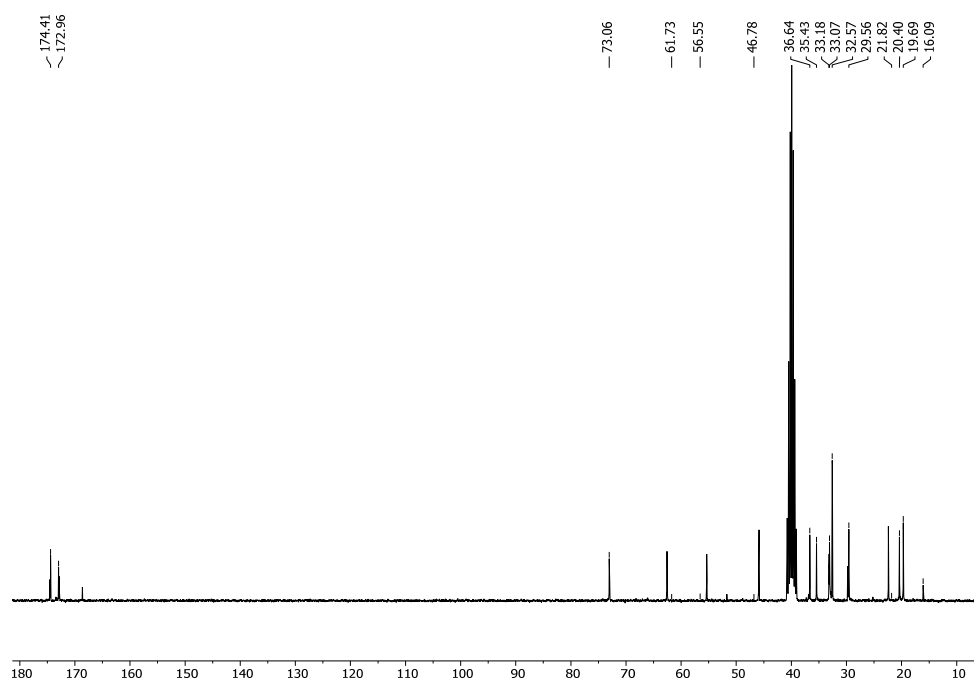

**Figure S13.** Typical  $^{13}\text{C}$  NMR ( $\text{DMSO-}d_6$ ) spectrum of P8.

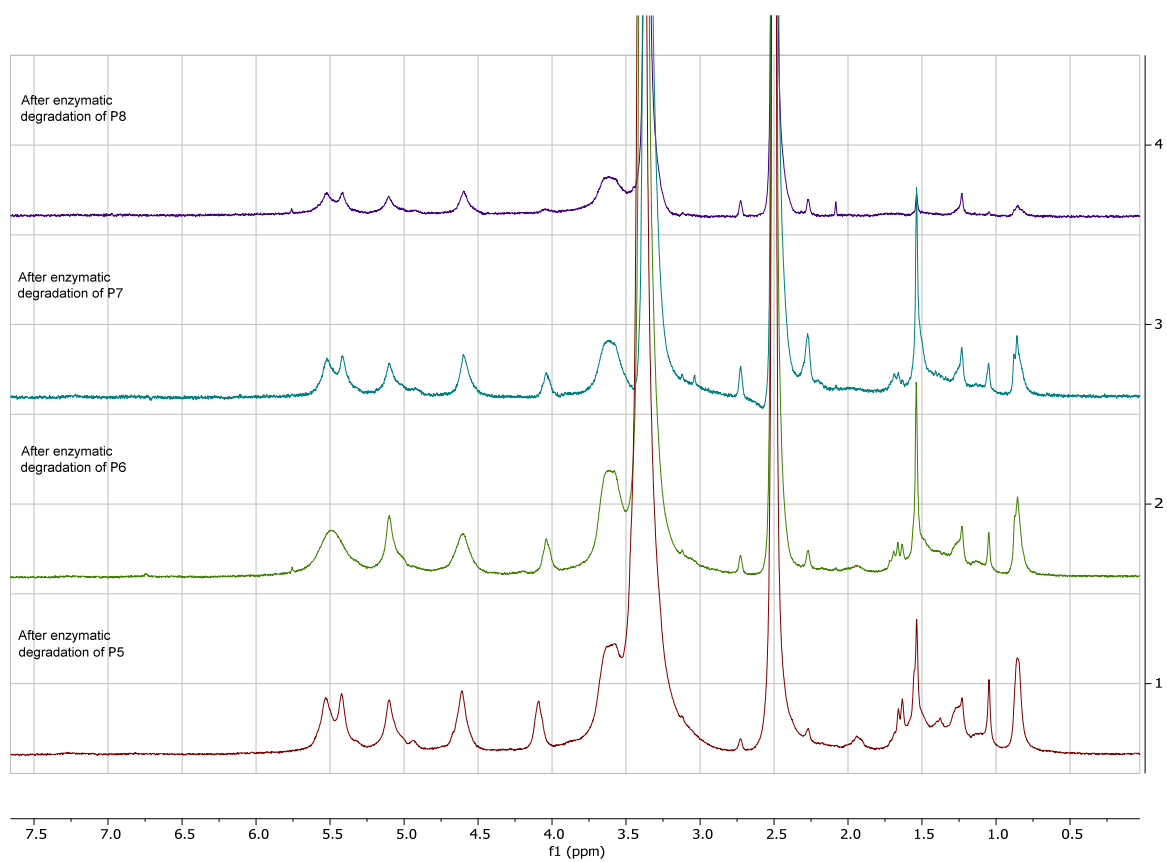

**Figure S14.**  $^1\text{H}$  NMR ( $\text{DMSO}-d_6$ ) spectra of the hydrolyzed products of P5, P6, P7 and P8 after enzymatic degradation (spectra 1, 2, 3 and 4 respectively).

# FTIR

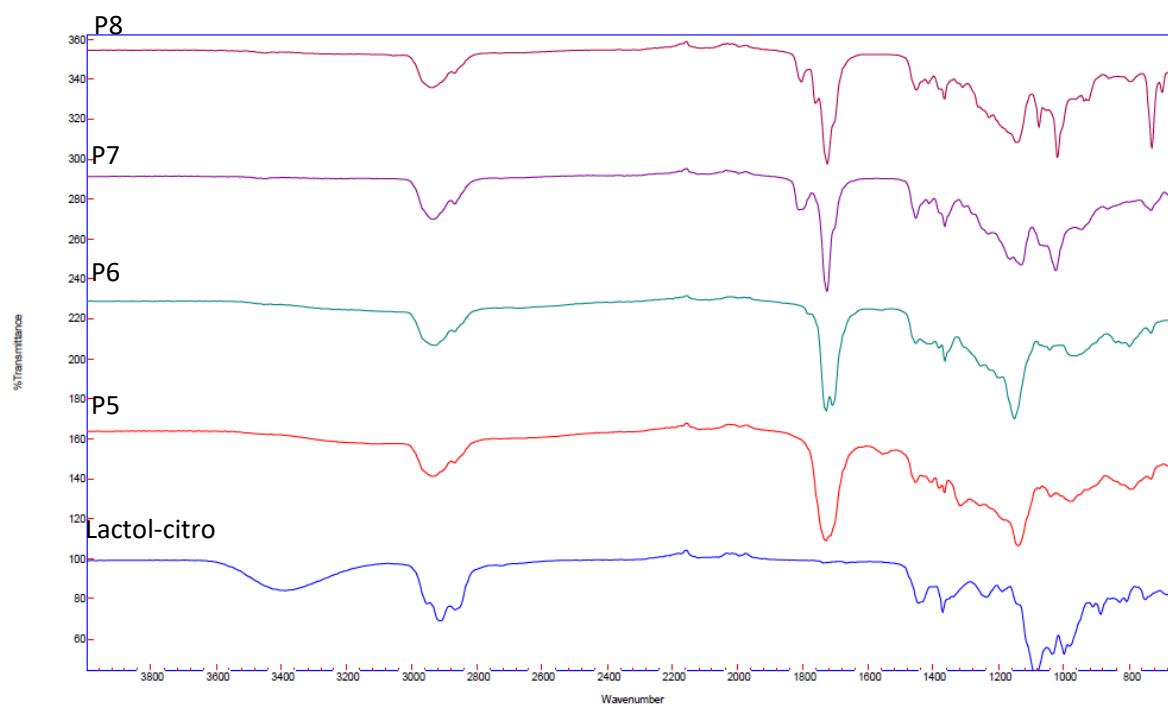

**Figure S15.** Typical FTIR spectra of P5-P8.

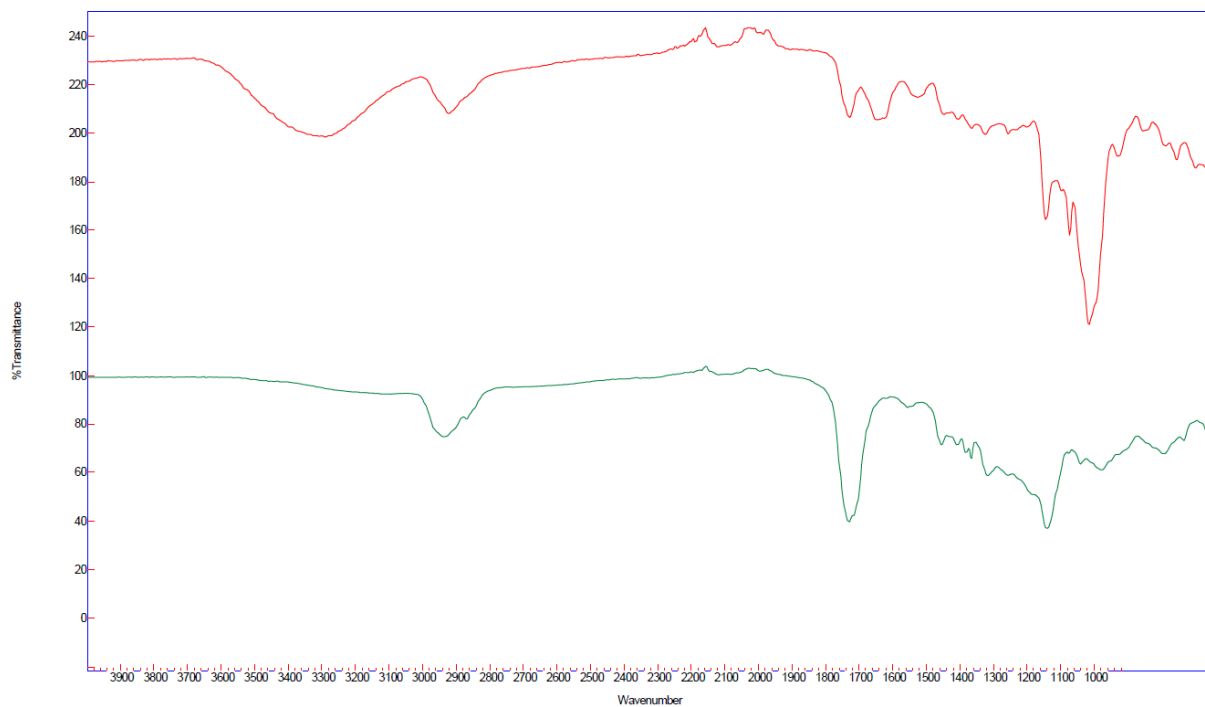

**Figure S16.** Typical FTIR spectra of P5 before and after enzymatic degradation (green and red, respectively).

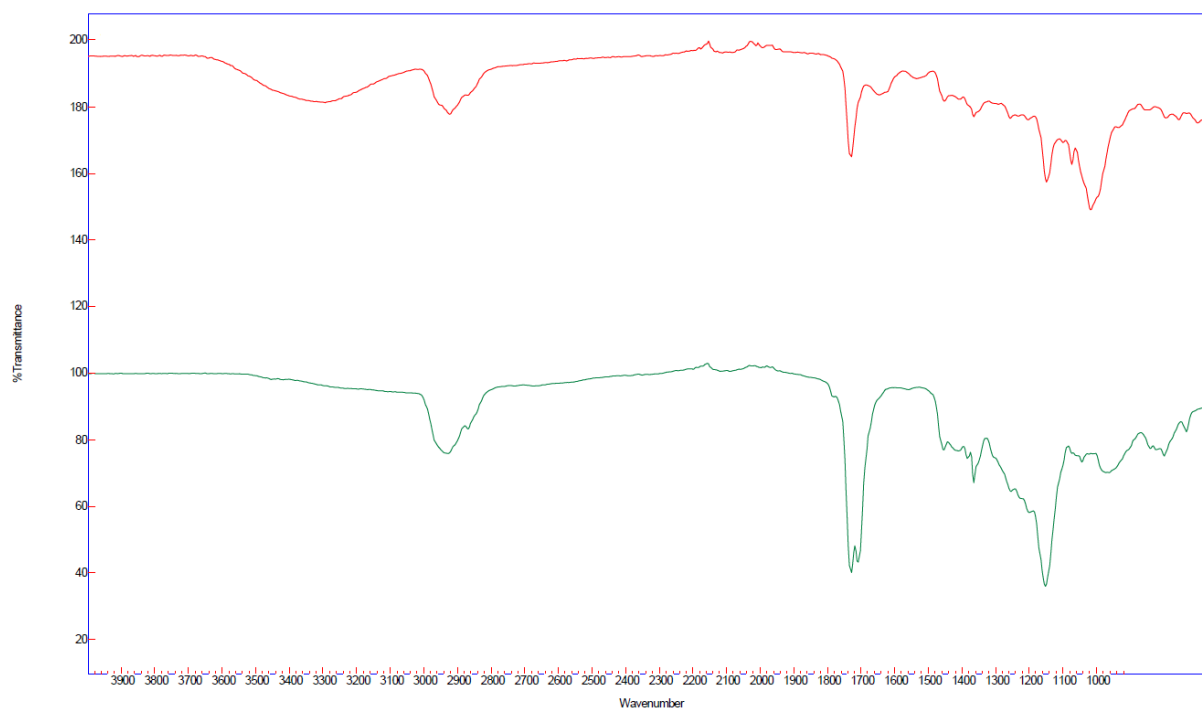

**Figure S17.** Typical FTIR spectra of P6 before and after enzymatic degradation (green and red, respectively).

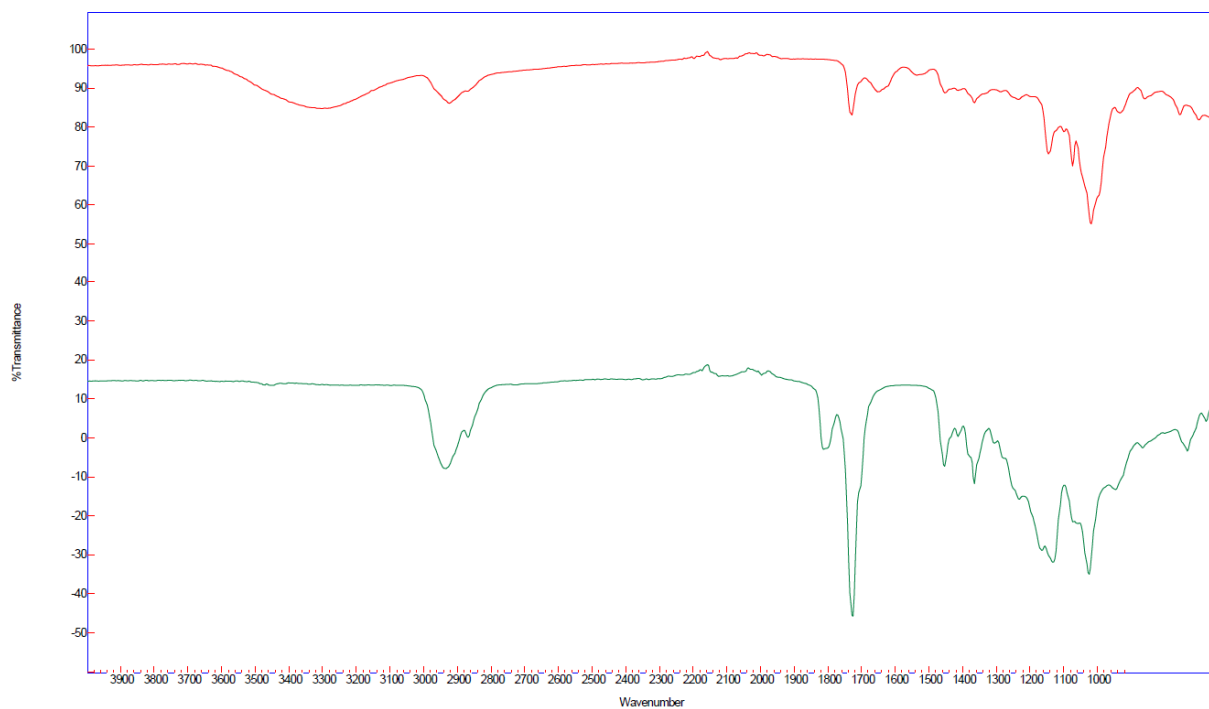

**Figure S18.** Typical FTIR spectra of P7 before and after enzymatic degradation (green and red, respectively).

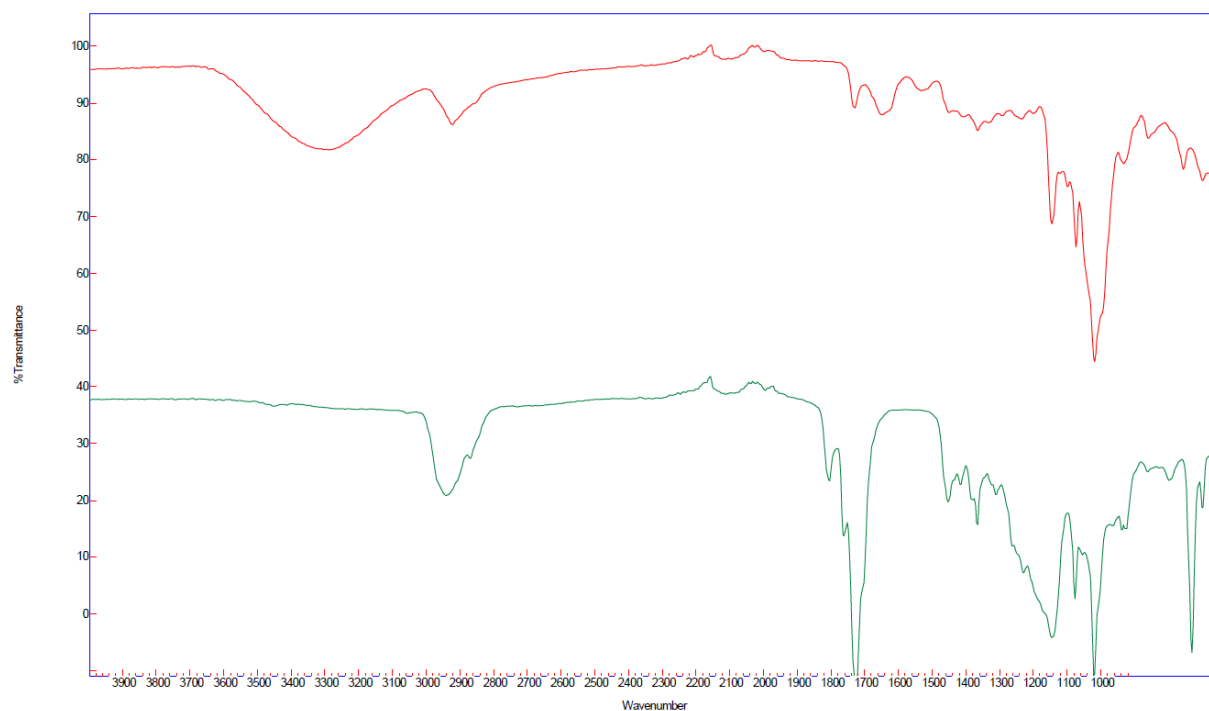

**Figure S19.** Typical FTIR spectra of P8 before and after enzymatic degradation (green and red, respectively).



# DSC

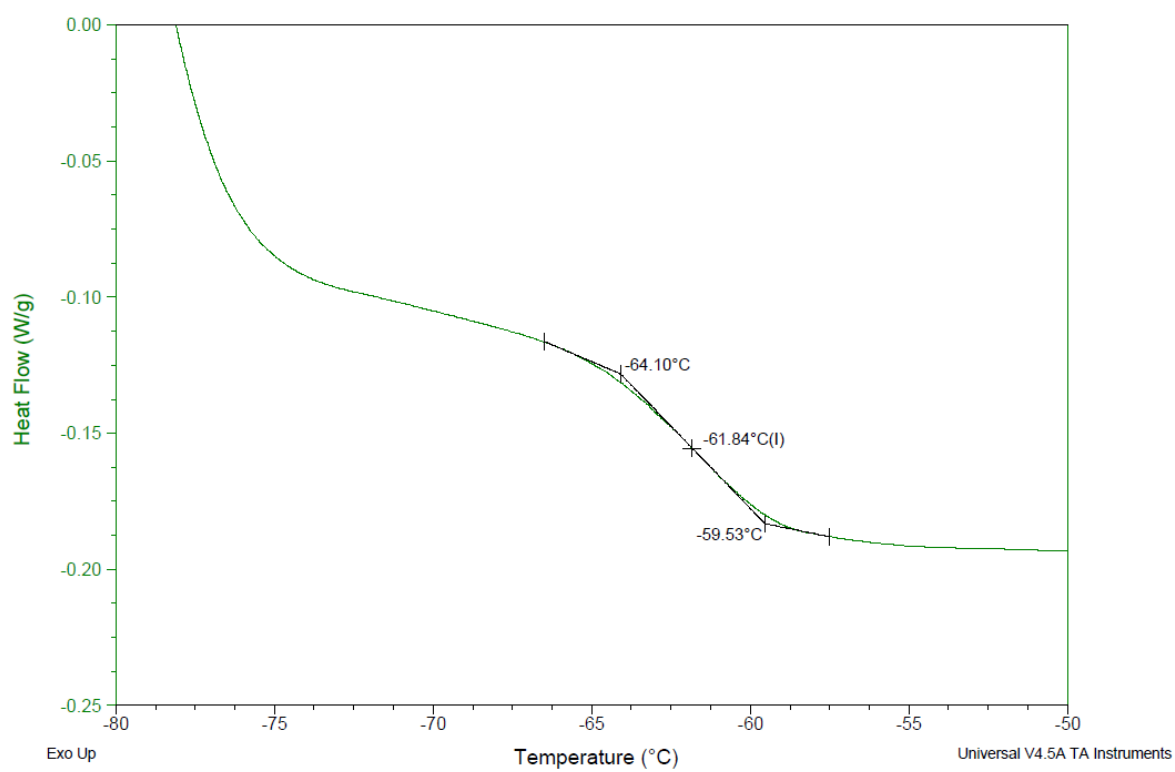

**Figure S20.** DSC thermogram (3<sup>rd</sup> heat cycle) of P5, run 1, Table 1.



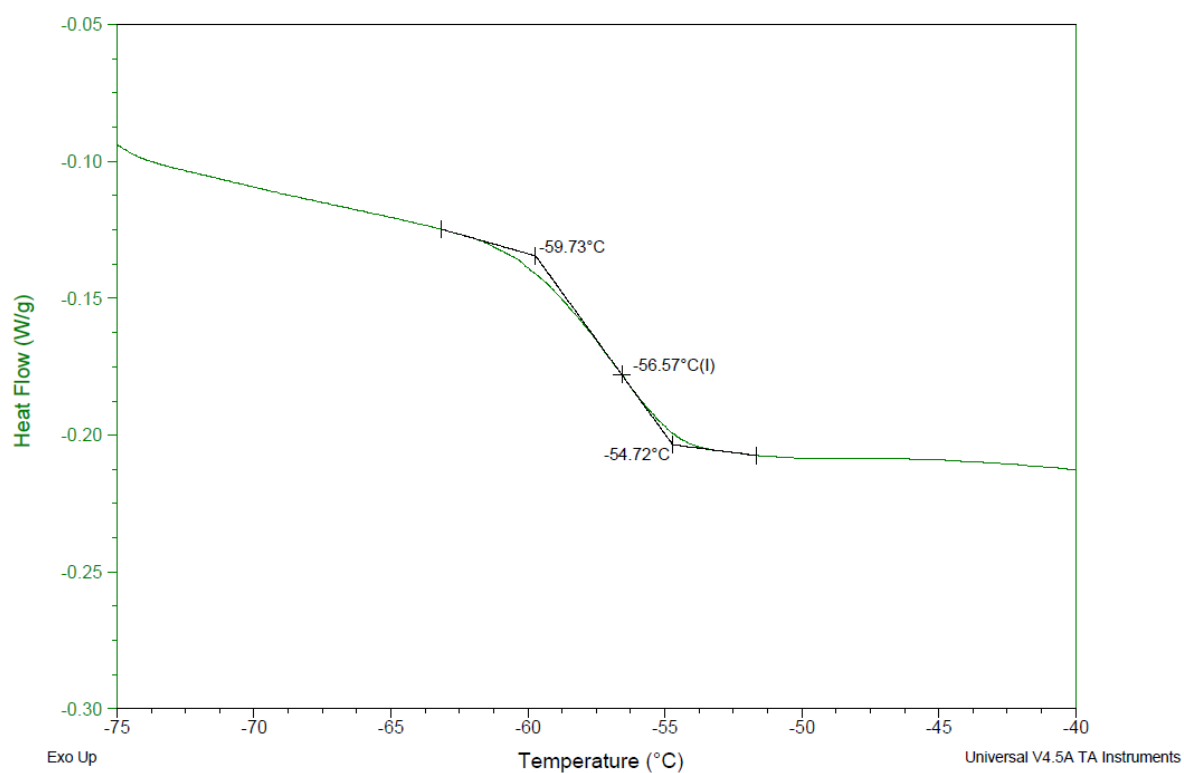

**Figure S21.** DSC thermogram (3<sup>rd</sup> heat cycle) of P6, run 2, Table 1.

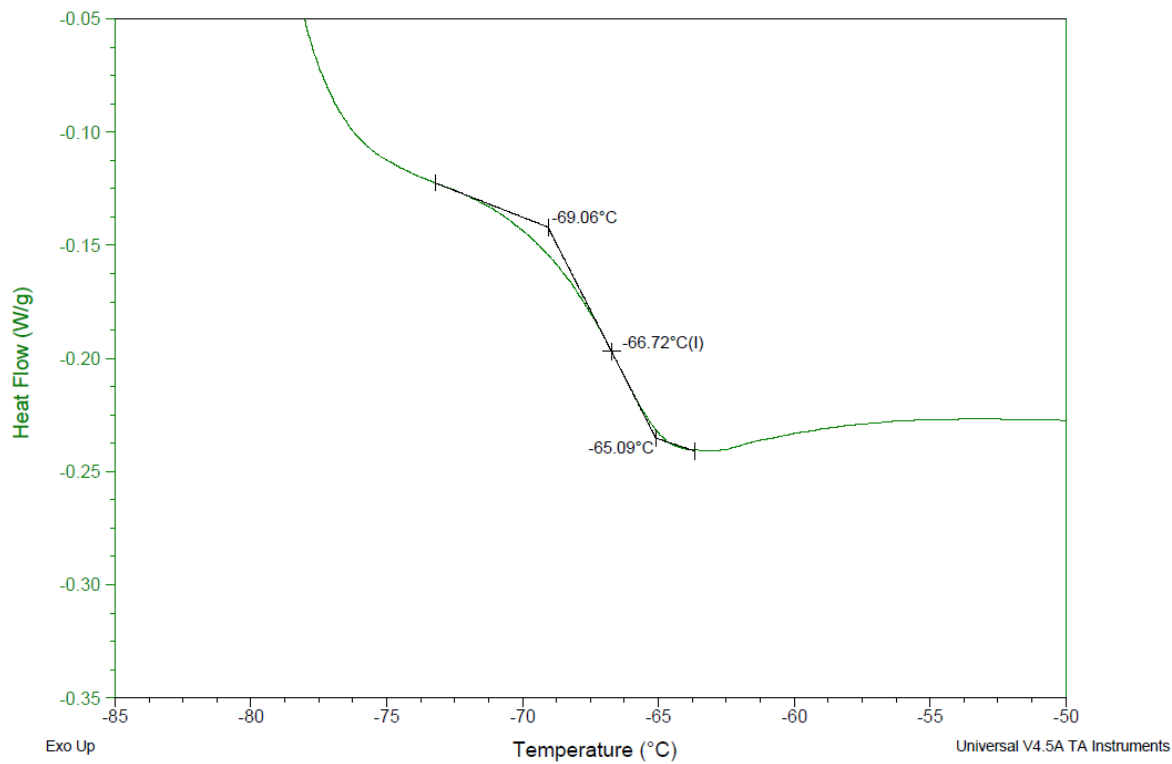

**Figure S22.** DSC thermogram (3<sup>rd</sup> heat cycle) of P7, run 3, Table 1.

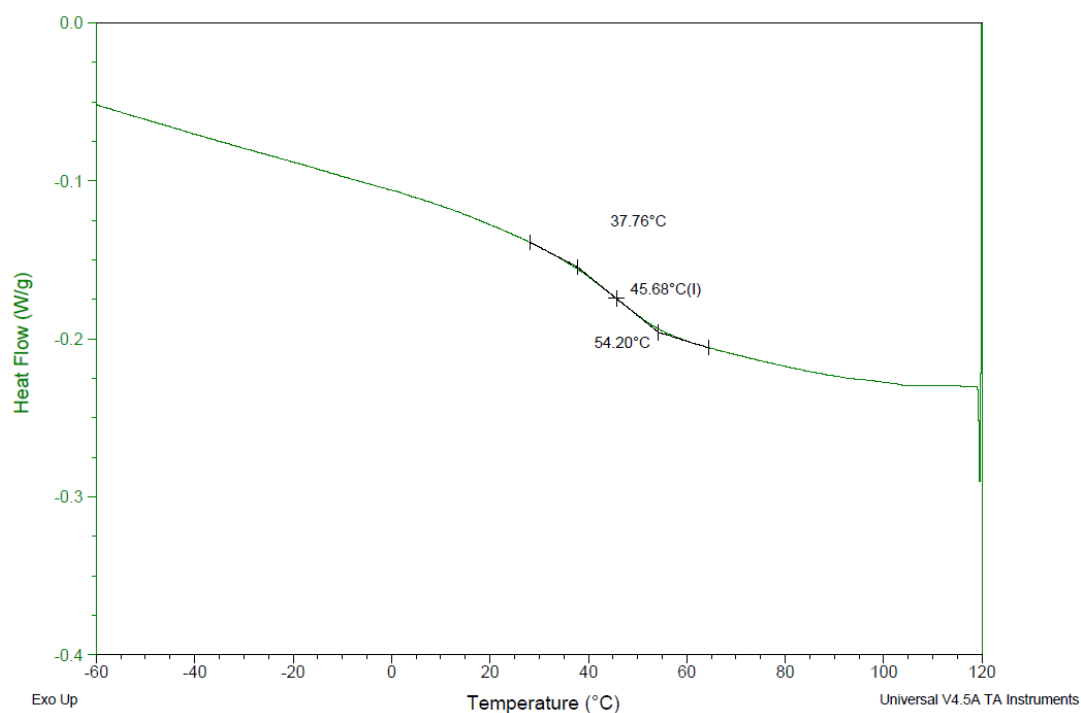

**Figure S23.** DSC thermogram (3<sup>rd</sup> heat cycle) of P5 after enzymatic degradation, run 1, Table 2.

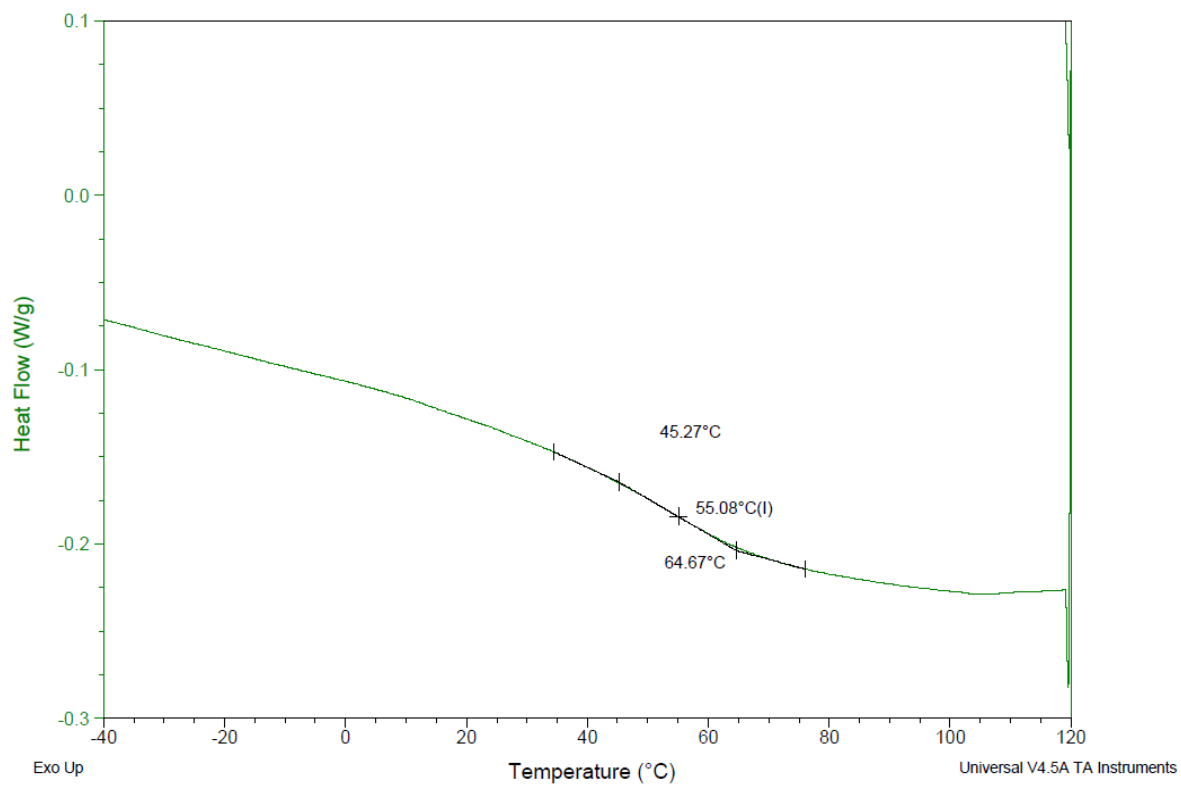

**Figure S24.** DSC thermogram (3<sup>rd</sup> heat cycle) of P6 after enzymatic degradation, run 2, Table 2.

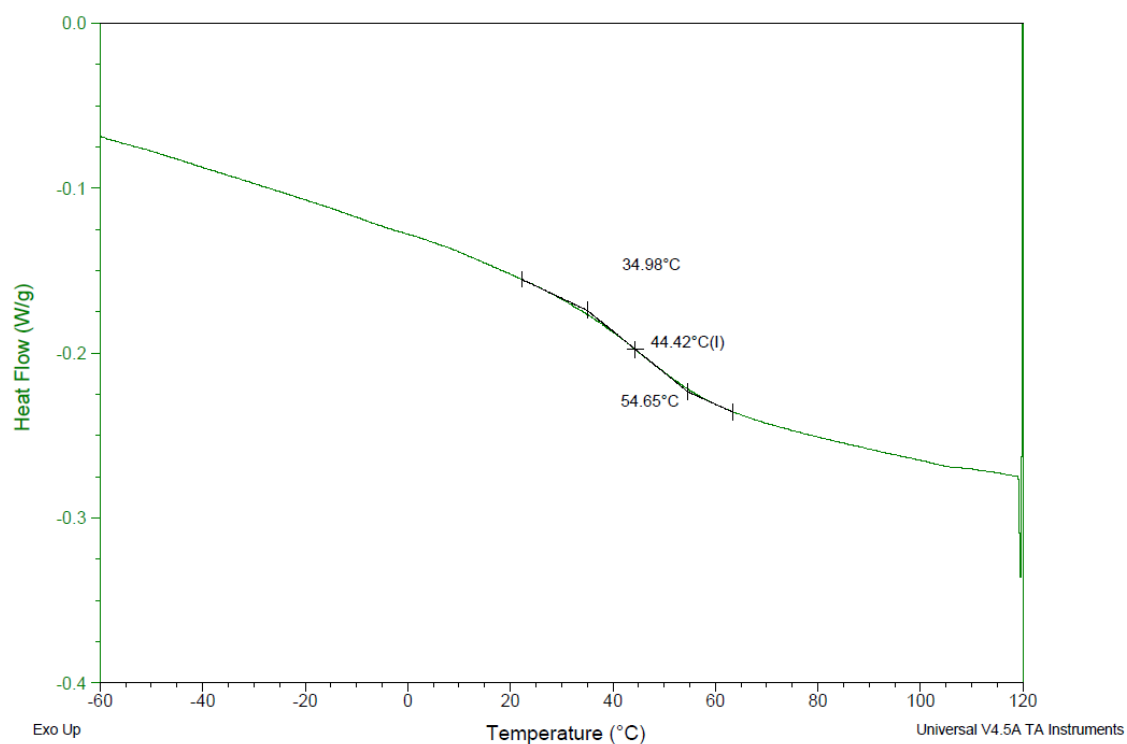

**Figure S25.** DSC thermogram (3<sup>rd</sup> heat cycle) of P7 after enzymatic degradation, run 3, Table 2.

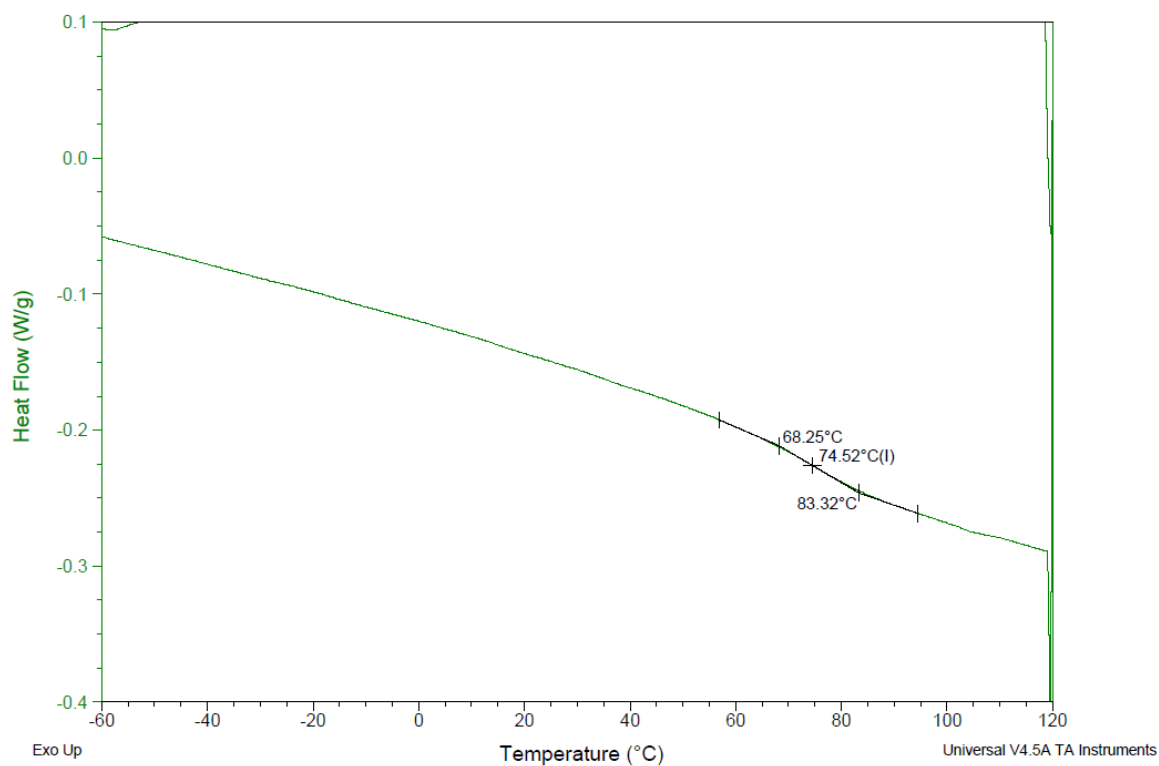

**Figure S26.** DSC thermogram (3<sup>rd</sup> heat cycle) of P8 after enzymatic degradation, run 4, Table 2.

# TGA

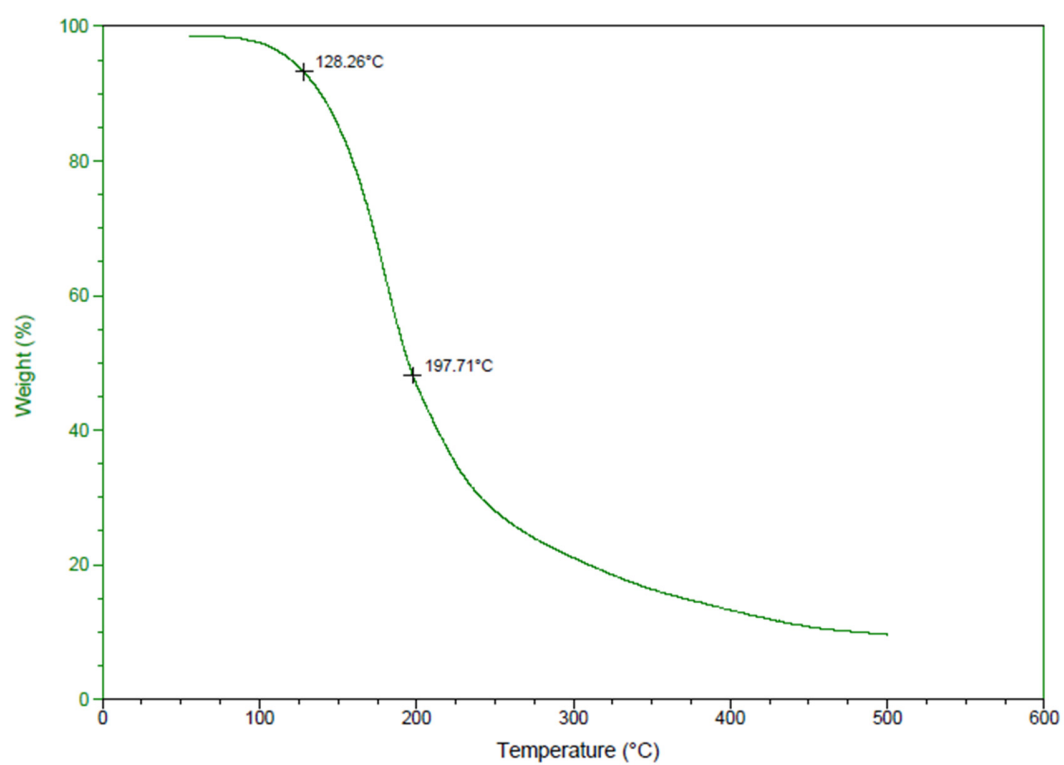

**Figure S27.** TGA thermogram of P5, run 1, Table 1.

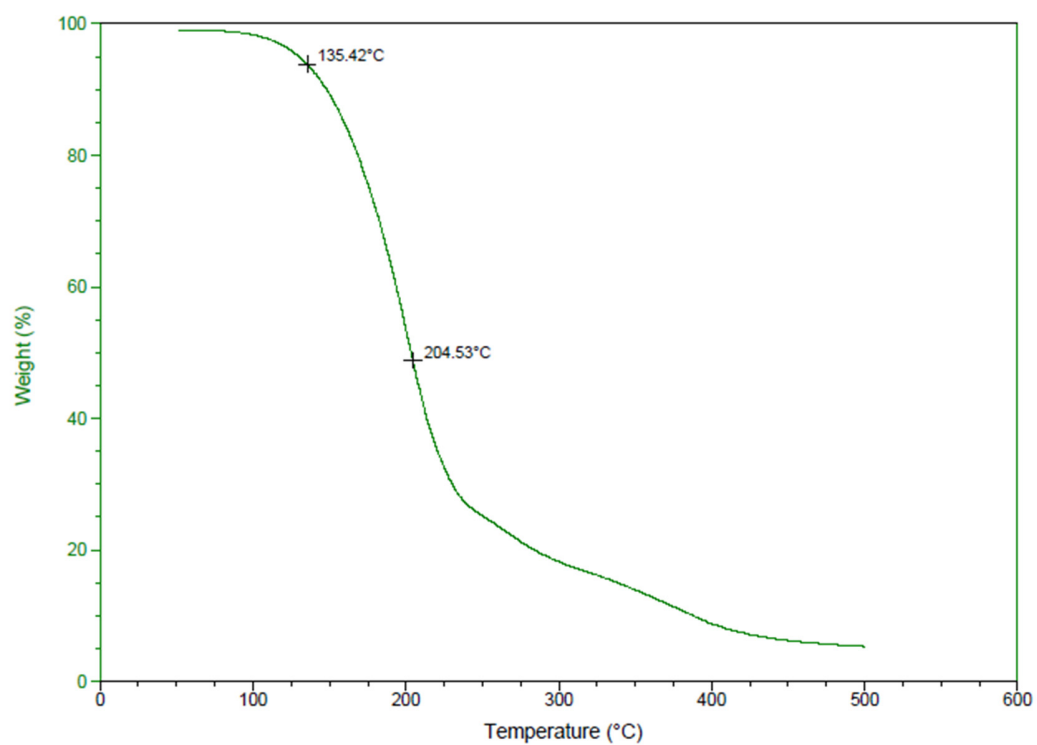

**Figure S28.** TGA thermogram of P6, run 2, Table 1.

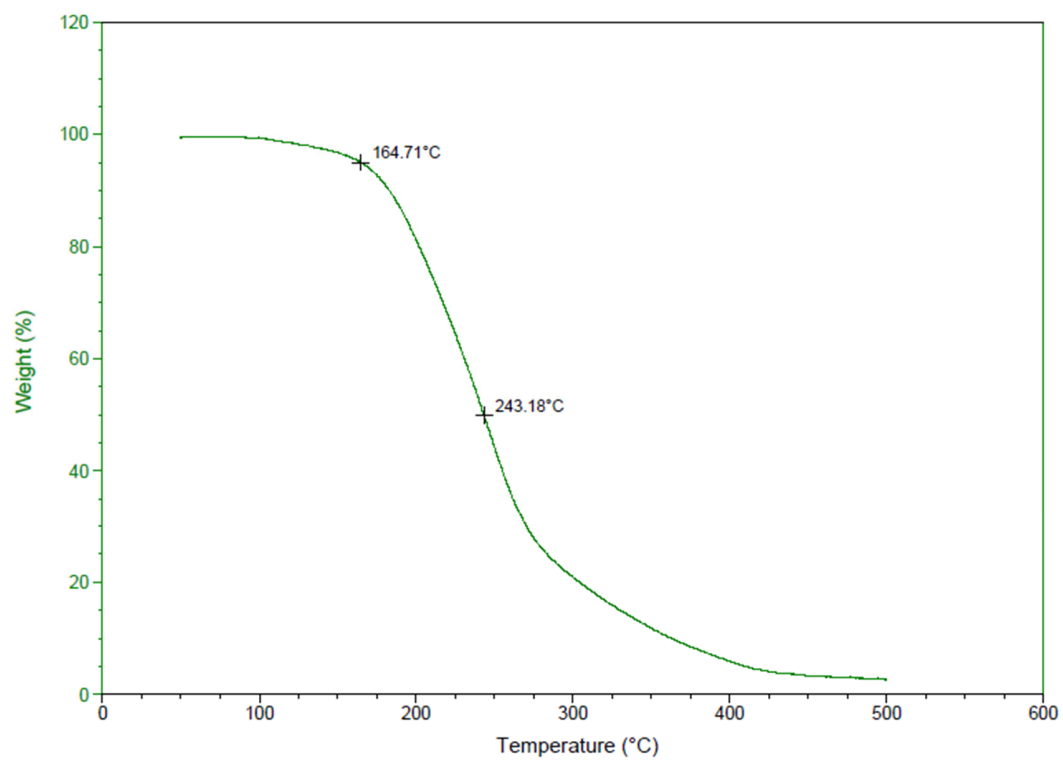

**Figure S29.** TGA thermogram of P7, run 3, Table 1.

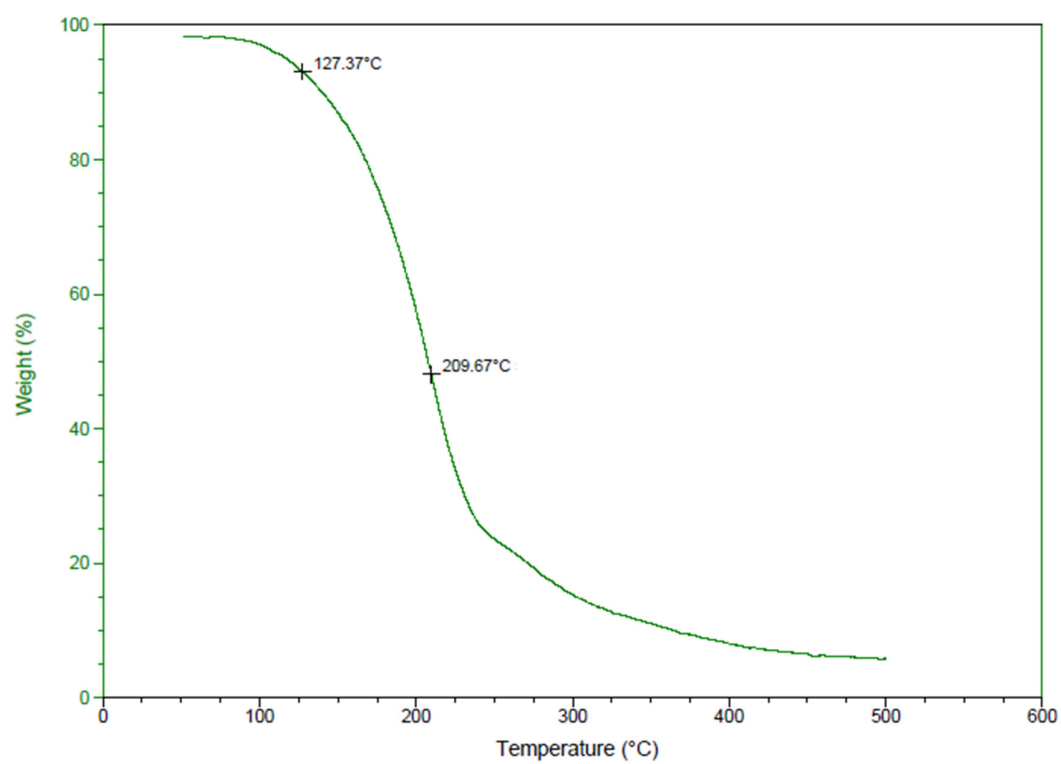

**Figure S30.** TGA thermogram of P8, run 4, Table 1.

# SEC

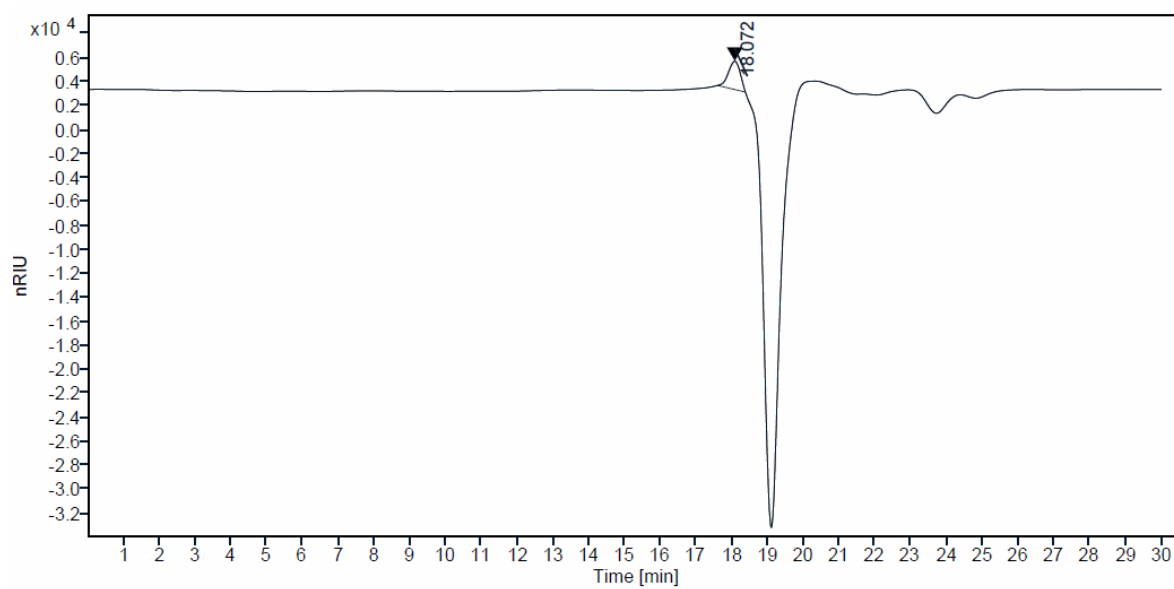

**Figure S31.** SEC trace of the resulting product of P5 after enzymatic degradation.



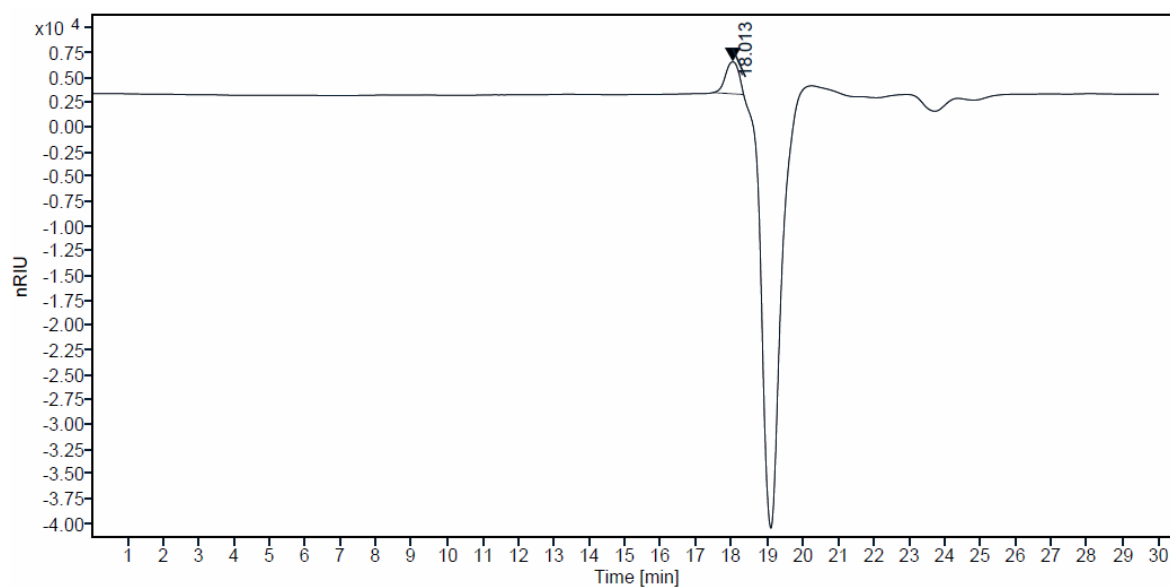

**Figure S32.** SEC trace of the resulting product of P6 after enzymatic degradation.

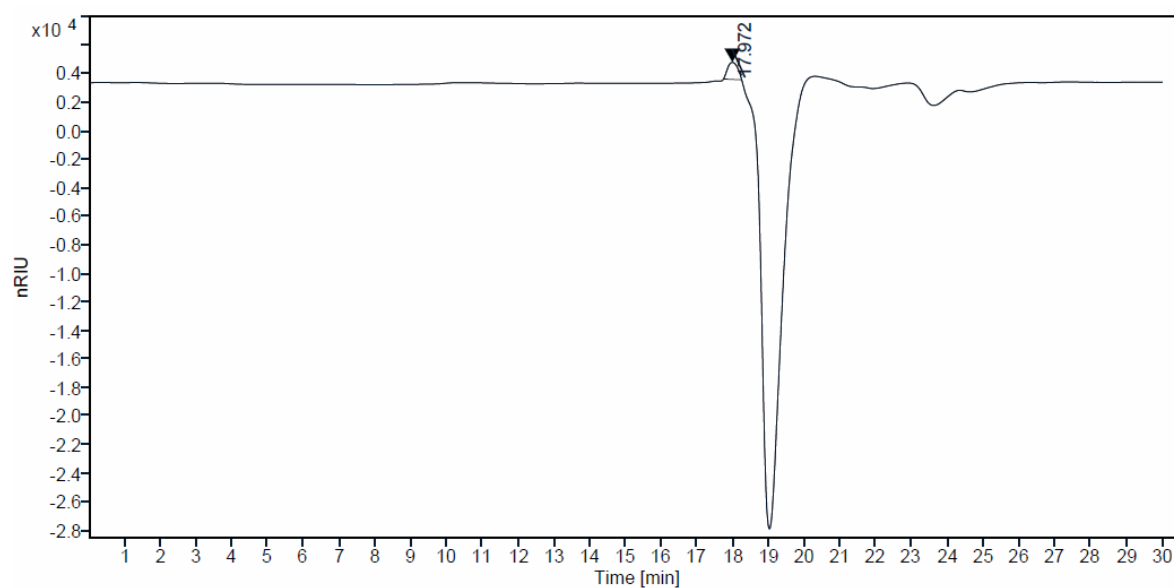

**Figure S33.** SEC trace of the resulting product of P7 after enzymatic degradation.

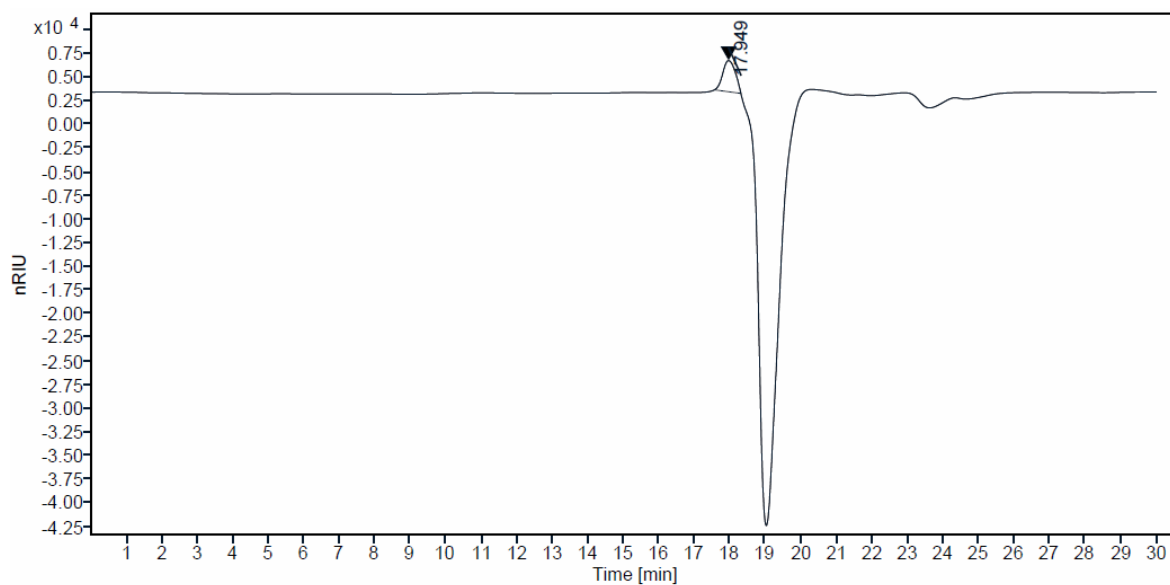

**Figure S34.** SEC trace of the resulting product of P8 after enzymatic degradation.
